# Supplementary material for: PSA density in the diagnosis of prostate cancer in the Chinese population: results from the Chinese Prostate Cancer Consortium
Source: PubMed Central journal article supplement — Asian J Androl. 2020 Nov 13;23(3):300–5. doi: 10.4103/aja.aja_61_20 (PMC8152427; doi:10.4103/aja.aja_61_20), 2020-11-13
Supplement: AJA-23-300_Suppl1.pdf [file AJA-23-300_Suppl1.pdf]

## SUPPLEMENTARY INFORMATION

A total of 18 hospitals across China participated in collecting the data of the patients and designing the study. All of the hospitals are listed below. <sup>1</sup>Shanghai Changhai Hospital, Second Military Medical University, Shanghai, China. <sup>2</sup>Peking University First Hospital, Institute of Urology, Peking University, National Urological Cancer center, Beijing, China. <sup>3</sup>The First Affiliated Hospital of Nanjing Medical University, Nanjing, China. <sup>4</sup>Renji Hospital, Shanghai Jiao Tong University, School of Medicine, Shanghai, China. <sup>5</sup>Huadong Hospital, Fudan University, Shanghai, China. <sup>6</sup>Tongji Hospital, Tongji Medical College, Huazhong University of Science and Technology, Wuhan, China. <sup>7</sup>West China Hospital, Sichuan University, Chengdu, China. <sup>8</sup>Zhujiang Hospital, Southern Medical University, Guangzhou, China. <sup>9</sup>Peking University Third Hospital, Beijing, China. <sup>10</sup>Peking University People's Hospital, Beijing, China. <sup>11</sup>The First Affiliated Hospital of Soochow University, Suzhou, China. <sup>12</sup>Xijing Hospital, The Fourth Military Medical University, Xi'an, China. <sup>13</sup>Tenth People's Hospital, Tongji University, Shanghai, China.

<sup>14</sup>The Third Hospital of Sun Yat-Sen University, Guangzhou, China. <sup>15</sup>Shanghai Changzheng Hospital, Second Military Medical University, Shanghai, China. <sup>16</sup>Wuhan General Hospital of Guangzhou Military Command, Wuhan, China. <sup>17</sup>First Affiliated Hospital, School of Medicine, Zhejiang University, Hangzhou, China. <sup>18</sup>The First Affiliated Hospital of Medical School, Xi'an Jiaotong University, Xi'an, China.

Some members of the Chinese Prostate Cancer Consortium provided assistance in data collection. The Chinese Prostate Cancer Consortium is: Yinghao Sun<sup>1</sup>, Yiran Huang<sup>2</sup>, Liping Xie<sup>3</sup>, Liqun Zhou<sup>4</sup>, Dalin He<sup>5</sup>, Qiang Ding<sup>6</sup>, Qiang Wei<sup>7</sup>, Pengfei Shao<sup>8</sup>, Ye Tian<sup>9</sup>, Zhongquan Sun<sup>10</sup>, Qiang Fu<sup>11</sup>, Lulin Ma<sup>12</sup>, Junhua Zheng<sup>13</sup>, Zhangqun Ye<sup>14</sup>, Dingwei Ye<sup>15</sup>, Danfeng Xu<sup>16</sup>, Jianquan Hou<sup>17</sup>, Kexin Xu<sup>18</sup>, Jianlin Yuan<sup>19</sup>, Xin Gao<sup>20</sup>, Chunxiao Liu<sup>21</sup>, Tiejun Pan<sup>22</sup>, Xu Gao<sup>1</sup>, Shancheng Ren<sup>1</sup>, Chuanliang Xu<sup>1</sup>, Rui Chen<sup>1</sup>. <sup>1</sup>Shanghai Changhai Hospital, Second Military Medical University, Shanghai, China. <sup>2</sup>Renji Hospital, Shanghai Jiao Tong University, School of Medicine, Shanghai, China. <sup>3</sup>First Affiliated Hospital, School of Medicine, Zhejiang University, Hangzhou, China. <sup>4</sup>Peking University First Hospital, Institute of Urology, Peking University, National Urological Cancer Center, Beijing, China. <sup>5</sup>First Affiliated Hospital of Medical School, Xi'an Jiaotong University, Xi'an, China. <sup>6</sup>Huashan Hospital, Fudan University, Shanghai, China. <sup>7</sup>West China Hospital, Sichuan University, Chengdu, China. <sup>8</sup>The First Affiliated Hospital of Nanjing Medical University, Nanjing, China. <sup>9</sup>Beijing Friendship Hospital, Capital Medical University, Beijing, China. <sup>10</sup>Huadong hospital, Fudan University, Shanghai, China. <sup>11</sup>Shanghai Jiao Tong University Affiliated Sixth People's Hospital, Shanghai, China. <sup>12</sup>Peking University Third Hospital, Beijing, China. <sup>13</sup>Tenth People's Hospital, Tongji University, Shanghai, China. <sup>14</sup>Tongji Hospital, Tongji Medical College, Huazhong University of Science and Technology, Wuhan, China. <sup>15</sup>Fudan University Shanghai Cancer Center and Department of Oncology, Shanghai, China. <sup>16</sup>Shanghai Changzheng Hospital, Second Military Medical University, Shanghai, China. <sup>17</sup>The First Affiliated Hospital of Soochow University, Suzhou, China. <sup>18</sup>Peking University People's Hospital, Beijing, China. <sup>19</sup>Xijing Hospital, The Fourth Military Medical University, Xi'an, China. <sup>20</sup>The 3<sup>rd</sup> Hospital of Sun Yat-Sen University, Guangzhou, China. <sup>21</sup>Zhujiang Hospital, Southern Medical University, Guangzhou, China. <sup>22</sup>Wuhan General Hospital of Guangzhou Military Command, Wuhan, China.

---
